# Supplementary material for: A Special Phenotype of Aconidial Aspergillus niger SH2 and Its Mechanism of Formation via CRISPRi
Source: MDPI journal article supplement (doi:10.3390/jof8070679), 2022-06-28
Supplement: s1 [file s1]

Supplementary information for

**Spore-like Propagule: A Special Phenotype in Aconidial *Aspergillus niger* SH2 and Its Mechanism of Formation via CRISPRi**

Le-Yi Yu, Lin-Xiang Li, Lin-Lin Yao, Jun-Wei Zheng, Bin Wang, Li Pan\*

School of Biology and Biological Engineering, South China University of Technology,

Guangzhou Higher Education Mega Center, Guangzhou 510006, China;

995495986@qq.com (L.Y.Y.); 329958317@qq.com (L.X.L.);

linlinyaozsyx@163.com (L.L.Y.); 1076241382@qq.com (J.W.Z.);

btbinwang@scut.edu.cn (B.W.);

\* Correspondence: btlipan@scut.edu.cn (L.P.)

Supplementary materials include the following:

Total pages: 16; total figures: 4; total tables: 12;

**Table S1** The strains used in this study.

**Table S2** The semi-quantitative RT-PCR system.

**Table S3** The primers used in this study.

**Table S4** The sequences of the *dCas9-MxiI* ORF, common sgRNA cassette and *pyrG* sgRNA expression cassette.

**Table S5** The T7 transcription system of the protospacer RNA.

**Table S6** The ethanol precipitation system of the RNA.

**Table S7** The NLS-Cas9 Nuclease cleavage of the target gene system in vitro.

**Table S8** The quality control of the RNA samples.

**Table S9** The expression of conidia-associated genes (CAGs) in the spore-like propagule and normal hypha.

**Table S10** The expression of germination-associated genes (GeAGs) in the spore-like propagule and normal hypha.

**Table S11** The expression of genes involved in the production of enzymes involved in cell wall synthesis or processing.

**Table S12** The expression and spacer RNA sites of genes involved in the N-acetyl-D-glucosamine metabolic pathway and conidia.

**Figure S1** The flowchart of spore-like propagule purification.

**Figure S2** The RNA sequence of spore-like propagule.

**Figure S3** The flow chart of CRISPRi construction on conidia and GlcNAc metabolic pathway genes.

**Figure S4** The construction of CRISPRi on conidia and GlcNAc metabolic pathway genes in the *Aspergillus niger* SH2.

**Table S1** The strains and plasmids used in this study.

| Strain / Plasmid                              | Genotype / Marker                                                                                | Source                   |
|-----------------------------------------------|--------------------------------------------------------------------------------------------------|--------------------------|
| <i>E. coli</i> Mach1 <sup>TM</sup> T1         | Host of Molecular cloning                                                                        | Invitrogen, USA          |
| <i>A. niger</i> SH2                           | Wild type                                                                                        | A factory, China         |
| <i>A. niger</i> CBS513.88                     | Wild type                                                                                        | CBS-KNAW,<br>Netherlands |
| <i>A. niger</i> SH2 $\Delta ku\Delta pyrG$    | $\Delta ku\Delta pyrG$                                                                           | This study               |
| <i>A. niger</i> SH2 $\Delta Dac1$             | $\Delta ku\Delta pyrG \Delta Dac1::pyrG$                                                         | This study               |
| <i>A. niger</i> SH2 <i>Dac1</i> recovery      | $\Delta ku\Delta pyrG$                                                                           | This study               |
| <i>A. niger</i> SH2 CRISPRi- <i>Dac1</i>      | $\Delta ku\Delta pyrG$ dCas9-Mxi1 ORF-AMA1: <i>pyrG</i> ;<br><i>Dac1</i> -sgRNA ORF: <i>hygB</i> | This study               |
| <i>A. niger</i> SH2 CRISPRi- <i>Uap1</i>      | $\Delta ku\Delta pyrG$ dCas9-Mxi1 ORF-AMA1: <i>pyrG</i> ;<br><i>Uap1</i> -sgRNA ORF: <i>hygB</i> | This study               |
| <i>A. niger</i> SH2 CRISPRi- <i>Ngt1</i>      | $\Delta ku\Delta pyrG$ dCas9-Mxi1 ORF-AMA1: <i>pyrG</i> ;<br><i>Ngt1</i> -sgRNA ORF: <i>hygB</i> | This study               |
| <i>A. niger</i> SH2 CRISPRi- <i>Hxk1</i>      | $\Delta ku\Delta pyrG$ dCas9-Mxi1 ORF-AMA1: <i>pyrG</i> ;<br><i>Hxk1</i> -sgRNA ORF: <i>hygB</i> | This study               |
| <i>A. niger</i> SH2 CRISPRi- <i>hfbD</i>      | $\Delta ku\Delta pyrG$ dCas9-Mxi1 ORF-AMA1: <i>pyrG</i> ;<br><i>hfbD</i> -sgRNA ORF: <i>hygB</i> | This study               |
| <i>A. niger</i> SH2 CRISPRi-GC                | $\Delta ku\Delta pyrG$ dCas9-Mxi1 ORF-AMA1: <i>pyrG</i> ;<br>GC-sgRNA ORF: <i>hygB</i>           | This study               |
| <i>A. niger</i> SH2<br>CRISPRi-MAPK1          | $\Delta ku\Delta pyrG$ dCas9-Mxi1 ORF-AMA1: <i>pyrG</i> ;<br>MAPK1-sgRNA ORF: <i>hygB</i>        | This study               |
| <i>A. niger</i> SH2<br>CRISPRi-dCas9-Mxi1     | $\Delta ku\Delta pyrG$ dCas9-Mxi1 ORF-AMA1: <i>pyrG</i>                                          | This study               |
| <i>A. niger</i> SH2 CRISPRi-dCas9             | $\Delta ku\Delta pyrG$ dCas9 ORF-AMA1: <i>pyrG</i>                                               | This study               |
| <i>A. niger</i> SH2 CRISPRi-non<br>spacer RNA | $\Delta ku\Delta pyrG$ dCas9-Mxi1 ORF-AMA1: <i>pyrG</i> ;<br>non spacer -sgRNA ORF: <i>hygB</i>  | This study               |

**Table S2** The semi-quantitative RT-PCR system.

|                               |            |
|-------------------------------|------------|
| Green taq mix (Vazyme, China) | 10 $\mu$ L |
| cDNA                          | 1 $\mu$ L  |
| Primer-F                      | 1 $\mu$ L  |
| Primer-R                      | 1 $\mu$ L  |
| ddH <sub>2</sub> O            | 7 $\mu$ L  |
| Total                         | 20 $\mu$ L |

Cycles: 27

**Table S3** The primers used in this study.

| Primer name                  | Primer sequences (5'→3') |
|------------------------------|--------------------------|
| <b>Primers used for qPCR</b> |                          |
| <i>Dac1</i> -qPCR-F          | GACGGGTGTGACTTCATACT     |
| <i>Dac1</i> -qPCR-R          | AGTGAGGTTCTCTTTGCCATA    |
| <i>Uap1</i> -qPCR-F          | TTTCCAGCAGCACAACTACTT    |
| <i>Uap1</i> -qPCR-R          | AGTAGGTGTGAATGTGCTGG     |
| DC-qPCR-F                    | CACTCATATCCTTGCCGTTT     |
| DC-qPCR-R                    | ATTCCATTAGTCTCGCAGCAA    |
| GC-qPCR-F                    | GAAACTTCGCCAACCGCTC      |
| GC-qPCR-R                    | TCCTCAGGTTTCATCTTCATCA   |
| <i>hxaA</i> -qPCR-F          | CCTACCCCGCCACCCAG        |
| <i>hxaA</i> -qPCR-R          | GTGTAAGAAGAGGCGATGAG     |
| <i>Ng1</i> -qPCR-F           | ACCTGGGTGGCGTGATTGG      |
| <i>Ng1</i> -qPCR-R           | GGTGTCGTAGAGACCTTTGA     |
| MAPK1-qPCR-F                 | ATCCCGACGATAGACAGAGA     |
| MAPK1-qPCR-R                 | GACATTGCCTCGTCGCTCA      |

**Table S4** The sequences of the *dCas9-MxiI* ORF, common sgRNA cassette and *pyrG* sgRNA expression cassette.

| 1. The sequences of the <i>dCas9-MxiI</i> ORF                                                                                                                                                                                                                                                                                                                                                                                                                                                                                                                                                                                                                                                                                                                                                                                                                                                                                                                                                                                                                                                                                                                                                                                                                                                                                                                                                                                                                                                                                                                                                                                                                                                                                                                                                                                                                                                                                                                                                                                                                                                                                                                                                                                                                                                                                                                                                                                                                                                                                                                                                                                                                                                                                                                                                                                                                                                                                                                                                                                                                                                                                                                                                                                                                                                                                                                                                                                                                                                   |
|-------------------------------------------------------------------------------------------------------------------------------------------------------------------------------------------------------------------------------------------------------------------------------------------------------------------------------------------------------------------------------------------------------------------------------------------------------------------------------------------------------------------------------------------------------------------------------------------------------------------------------------------------------------------------------------------------------------------------------------------------------------------------------------------------------------------------------------------------------------------------------------------------------------------------------------------------------------------------------------------------------------------------------------------------------------------------------------------------------------------------------------------------------------------------------------------------------------------------------------------------------------------------------------------------------------------------------------------------------------------------------------------------------------------------------------------------------------------------------------------------------------------------------------------------------------------------------------------------------------------------------------------------------------------------------------------------------------------------------------------------------------------------------------------------------------------------------------------------------------------------------------------------------------------------------------------------------------------------------------------------------------------------------------------------------------------------------------------------------------------------------------------------------------------------------------------------------------------------------------------------------------------------------------------------------------------------------------------------------------------------------------------------------------------------------------------------------------------------------------------------------------------------------------------------------------------------------------------------------------------------------------------------------------------------------------------------------------------------------------------------------------------------------------------------------------------------------------------------------------------------------------------------------------------------------------------------------------------------------------------------------------------------------------------------------------------------------------------------------------------------------------------------------------------------------------------------------------------------------------------------------------------------------------------------------------------------------------------------------------------------------------------------------------------------------------------------------------------------------------------------|
| <p>Green: <i>Ptef</i></p> <p>Black: linker</p> <p>Orange: SV40 NLS</p> <p>Blue: <i>dCas9</i></p> <p>Purple: <i>MxiI</i></p> <p>Red: <i>Ttef</i></p> <p>cgagacagcagaatcaccgccaagttaagcctttgtgctgatcatgctctgaacgggccaagttcgggaaaagcaaaggagcgtttagtg<br/> aggggcaatttgactcacctcccaggcaacagatgaggggggcaaaaagaaagaaatttctgtagtcaatatggattccgagcatcattttct<br/> tgcgtctatcttgctacgtatgttgatcttgacgtgtggatcaagcaacgccactcgtcgtccatcgcaggtggtcgcagacaaattaa<br/> aggcgggcaactcgtacagccgcggggtgtccgtgcaaagtacagagtataaaagccgcatcgcaccatcaacgcgttgatgccca<br/> gctttttgatccgagaatccaccgtagaggcgatagcaagtaaaagaaagctaaacaaaaaaaaatttctgccctaagccatgaaaacgag<br/> atggggtggagcagaaccaaggaagagtcgcgtgggtgctccgtccggaaggtgtttaaaggctcgacgccaaggtgggagcttag<br/> gagaagaatttgcacgaggagtgaggcggttaccctccatatccaatgacagatatctaccagccaagggttgagccccccgcttagtc<br/> gtcgtcctcgttgccctccataaaaggatttccctccctccacaaaatttcttccctcctccttctgctcgttcagtactatatttcc<br/> cttccctcgttctcctccatcttcttccatccatctcgtcctaacttctcgtcagcacctctacgcattactagccgtagtatctgagcacttct<br/> cccttttatattccacaaaacataacacacacttcaccggccatta<b>ccaagaaaaagcgaagggtg</b>GGGCCCatggacaagaagtatag<br/> catcgggctggctatttgaacgaactcgggtggtgggtgtgattacggacgaatacaaggtgccatccaagaagttaaggtcctgggaaa<br/> caccgaccgtcactcaatcaagaagaatctcattggagccctgctctcgtatgtgggagaccgccgaagctactcactgaagcgaacgg<br/> ctcgcggcggtatatacagcgaagaatcgcatctgctacctccaggagatttccagcaacgaaatggctaaggtgatgactatttctcat<br/> cgactcgaagaaagtcttctggtcaggagagataagaagcacgagcgccatccgatcttggtaacattgtggatgaggttgccatcacgaa<br/> aagtaccaactatctatctctgtaagaagctggtcgtatgacgagcaggaaggctgatttgcgacttatctacctggcactcgcgcacatgat<br/> taagttccgcggccatttctatcgaggggtgacctgaacccgataattctgacgttgataagctcttcatccagttggtccaaacctacaatcag<br/> ctgtttgaggaaaacctattaatgcatctggcgtggacgccaaggctatccttccgcgcgctgtctaagtcgcgcgcttggagaaccttat<br/> cgcacaactccccggcgaagaaagacggcctcttcggttaatttgattgctgtcacttggtcgtgactcctaactcaagagtaattttgacct<br/> ggcagaggatgcgaagctccagttgtctaaggatagctatgatgacgatctcgacaacttgcttgcccaaatcggtgaccagtacgctgatctt<br/> ttcctggccgctaagaatctctcagatgcaatcctgctcagtgacattttcggggtcaacaccgagattactaagccccctgtcagctagat<br/> gatcaagcggatgatgagcaccatcaggacctcacctgcttaaggccctcgtgcgtcagcaattgcctgagaagtacaaggaaatcttctt<br/> gaccaatccaagaacggatacgcagggtatattgatggcggtgcgagccaggaggaattctacaagtttatcaagccgattttggagaagatg<br/> gacggcactgaggaactgctcgtcaagctgaatcgcaagatttgctcgttaagcaacgaacgttcgacaacggctccatcccgcaccagat<br/> tcacttgggcgagctccacgccatcttcgacgcagggaagatttctaccatttctgaaggacaaccgtgagaagatcgaagattcttaca<br/> ttccgaatcccctactatgtgggacctttggccggtgggaattcccatttgcgttgatgaccgaaagagcggaggaaaccatcactccgtgga<br/> acttcgaggaagtcgtggacaagggtgcatccgcgagagcttcattgagcggatgaccaatttataagaacctccgaatgaaaagggtcc<br/> tgccaaagcattcgtcgtctacgagatttaccgtgtataacgaactgactaagggtcaagtacgtgacggagggaatgcgggaagccagcct<br/> tccttcagggggaacaaaagaaggctatcgtgatttgccttttaagaccaatcgtaaaagtactgttaagcagctgaaggaggattatttcaag<br/> aagattgaatgttgcactccgtcagatcagcggcggtggaagatcgctttaacgcttccctcggtaacctaccacgacctgctcaagatcattaa<br/> ggacaaggatttctcgataacgaggaaaatgaggacatcttgaagatattgtcctcacgttgacacttttgaggaccgcgaaatgatcgag<br/> gaacggctcaagacatatgccatttgcgtacgataaggtgatgaagcagctgaagcggcgctgataccggatgggggtcgcttagccg<br/> gaagctgatcaacggcattcgagataagcaatctggttaagctatcttgatttcttaagtcggacggcttcgccaaccgcaatttatgacgt<br/> tattcacgacgattccctgacgttcaaggaggacatccagaaggcacaagctcaggacaaggggattccctgcacgagcatatcgccaacc</p> |

---

tggtggtatccccggcgatcaagaaggggattctcagaccgtcaaggtgtcgacgagctggtaaggtgatggccgtcataagccaga  
aaacatcgtgattgagatggcccagaaaatcagaccactcaaaagggcagagaacagccgcgagcggatgaagcggatcgaggaag  
gcattaaggaacttggttctcagatcctgaaggagcacccgtgtgaaaacacacagctccaaaatgagaagctgtatcttactatttgcaaat  
ggacgcgacatgtacgtcgatcaggagctcgacattaaccggtgtcgactacgatgtgacgctatcgtcccgaatccttctaaggacg  
atagcattgataacaaggtgctgactcgtcagataagaaccggggcaagtcgacaatgtccaagcgaggaagtggttaagaagatgaag  
aactactggcgccaattgcttaatgccaagctcatcacacagcgcaagtttgacaacttgaccaaggccgagcggggagggtgagtgaaact  
cgataaggctggcttcatcaagcgtcaactcgtggagacgcgacagatcacaaagcacgttgctcagattctggactcccggatgaacaaa  
agtacgacgagaatgataagctcatccgtgaagttaaggctattaccctcaagtctaagttggtgtcggattccgcaaggactccaatttata  
aggttccgggagatcaacaattatcacatgatgcgtacacgcagtcgtgggaactgcgctcatcaagaagtatccaagtgg  
agtccgaattcgtctacggggattataaggtttacgacgtccgaagatgatcgccaagagtgcaggaattggcaaggccacggctaag  
tatttctttactccaacatcatgaatttctaagacggagatcacactcgccaatggagaatccgtaagcgaccttgattgagaccaacggc  
gagactggtgaaatcgtttgggataaggggcgcgacttcgctaccgtgcggaaggttctgagcatgccgaagtcaatatcgaagaaaac  
cgaggtgcagacagcggttctctaaggaatcgatttccaaagcgttaactctgacaagctgatcgtcgaaagaaggattgggaccccaa  
gaagtatggagggttcgatttctctacagtggcatactcgggttcgtgtcggaaggttgagaagggaagtctaagaagctgaagtcggtc  
aaggaactgctcgggatcaccattatggagcgtccagcttcgaaaagaatccatcgactttctcaggccaagggtataaggaagtcaa  
gaaggatcttatcattaagctgcctaagtactcttgttcgagcttgaaaacggctgaaagcgaatgctcgcacatggcaggagagttgcagaag  
gggaatgaattggcacttccctcaaagtacgtgaacttctgtatctcgcgtccactacgagaagctgaagggtagccctgaggacaacgaa  
cagaagcaacttttgttgagcaacacaagcattatctggatgagatcattgaacagattcagagttcagtaagcgcgtcatcctcgccgatgct  
aatctcgacaaggtgtgtcggcctacaacaagcaccgtgacaagccgatccgagagcaggctgaaaatatcatcctgttccacctcacta  
acttgggagcaccagcagcgttcaagtatttggatcgacaatcgaccgtaagcgatacacgtccacaaaaggaggtgcttgatgcgacctga  
ttcatcaatccatcactgggctctatgaaacccgtatcgacctagtcaactggggggcgacGGGCCCccaagaaaaagcgcaagggtg  
ggtagttccaagcttggggcagcggggcgagcatggaacgtgtgagaatgattaatgtgcaaggctgttagaagccgcagagttttaga  
aagaagagaaagagaatgcgaacacgggtatgccagttcttcctagatgccctctcccagaggctaacctcgcccgcggaacttcgattt  
atgccgttatgacttcttaaaaaagcctttacgaatgaagaaatggaattagacttggtatgtagttgattctacaatggattatgattcctgaact  
tcaaatccgctgttcattattaatctcagctcttcccgtaaagccaatgttgaaactattcgtaaatgtacctcgttttgcgtgtacctgttcatcagct  
gatattacatgacctggacagagttctgcgcgaaagtcataacgtaaatccccggggcgttaggtgcgtccccggcggaaggttagtttctcgtc  
caccacaacgcgtttatcaacctcaactttcaacaacctcatgccacaaaagcgcgtgtaaaacaaagcgagatttgattgagcaagagggca  
ggatccaatgcgcgattcaagacattaaaaatggaaaatttcaaaaaattgcgcccgcagcgcgtgcatacaaaattcatccaatac

---

## 2. The sequences of the common sgRNA cassette

---

Light green: *aamA* upstream homologous arm

Green: *A. fumigatus* U6 promoter

Black: linker

Orange: *Not I* restriction enzyme cutting site

Blue: sgRNA scaffold

Red: *A. oryzae* U6 terminator

Purple: *hygB* cassette

Wathet: *aamA* downstream homologous arm

TGATAGTATCCGAAAGCTGCAAATTGCTTCATCGAGGCTGGCATTTCGATAGAAGAAAG  
AATTATAGACAACTAGTCTTGCAATATGACAATTCTCTTTGATTAATAAATGAAAGCACG  
CATGTATCAGCCTAATAGCCGAGTGGCGGGCATCTCTGGCGGCCTCCCGAGCAGCGTG  
GAATGCGTCCAAGATCCCGTCCGCGGGTCGTCTTCGGTCGGAATGATGACTGGAGCA  
GCAGACGATGTCTTGAGCTGAATGCATGTGATATTACATTCCAGGGAGAATTGTCGGC  
TATTTAGAACCCTCTCGGCTTAAAAGCCCTATTAGACTATGGGTGCGCTCAAGCCACTA  
GCCAGGATATCCCGCTGAACGCTCCATCACCTTGACGCTGAAGTGCAACATGGGACGG

---



---

GCTTTAACTTTTCGTAGATATAAGTTTAATTTATCCTCTCCACACCCATAGGGTCGTATGG  
TGTC AACCGGTGTAGTCTGCAGGATTTTCATCTCGCTTCGCCAAGCGAGGGCGCCCTAAC  
GGGCAGCCTGCAGCTTACCCTGTTAACCCCGGCTCACCACCCCCGAGCAATCCGTCG  
CGTCCTCCACGAGTCATAACAAGGTTCTGGGCGTTGTTTCTTACCCCCACTATCAGGCGT  
ATTCAGTTAACAGTCAGTAGTCCCGTGTCTGGAGATTTGTTGTTCTGCAACAATTAAAGG  
GGACCAGGGTTAAATCCTGGCCCCCGAACTGATCGGAGTTTCGGCCAATGAGAGATGT  
TGTATACCCCCGTTTCTGGCAGATGGATTAATTGCCGGCTCCATTTGGCATCCATCAAGC  
ATCATACGGGATTAGAAGGGTAGTTCGTGGGTTGATCTGCCGTGCAAGGTGCTCAAGG  
CTCTGGAGTCATGCTGAACGCAAATATTTAAGAATCGTCGTCAGGGACAGCGTTTCTCTG  
GATAGTCAAGCTGTGCTTGGGACGCTGTTCTGTCTGCTTTGTCAAAACATAATTTCGACG  
CGAATTCTTAATTAAgcaggcgggtgcaagcgtatcgtgaattgtggaggacgtaatggtgaaatgccgaatggcgaag  
caggtcgggagatcgggtgcgacgagcctgatgtagatgggtgcatactttctttcacaattcaagatcatgtattagaactacatt  
gctatgtttcagcaatatatgcatagctagagagcgtgttacgatgagacatgtaactttgaacatttctgtacagctgtcagagttcga  
aggttaagctcgagagcaaggaggggaaaagaagacaaaaaagacactcgggtccggtctcgaaccgacgaccttcgcacacacgtagaa  
ggtacagaaactcaacacctccaaaagggtctgtaagaatgaaaGCGGCCGCgttttagagctagaaatagcaagttaaataaggc  
tagtcggttatcaacttgaaaaagtgccaccgagtcgggtcgtttttttgagcatttatcagcttgatatagaggtaggaatgatggagggtcag  
aatggctattttgtattggagcgggttcgaaacggaggggcaggagacttttttaaatacgtcacgtgatatagagctgctGGGCCCGG  
TACCCGGGGATCCgctagtggaggtcaacacatcaatgctattttggtttagtcgtccaggcggatcacaaaattgtgtcgttgaca  
agatggttcatttaggcaactggtcagatcagccactgtgaagcagtagcggcggtcgaagtgtgactcttattagcagacaggaacga  
ggacattattatcatctgctgtggtgcacgataactgtgcgtttgcaagcaaggtgaagtgaacgaccgggtacaccttctaagtgcacct  
tctccctttatttcagattcaatctgacttacctattctaccaagcatccaaatgcctgaactcaccgagcgtctgtcgagaagtttctgatcga  
aaagttcgacagcgtctccgacctgatgcagctctcgaggggcggaagatcgtgctttcagcttcgatgtaggagggcggtgatgtcct  
gcggttaaatagctgcgccgatggtttctacaaagatcgttatgttatcggcactttgcatcgccgcgctcccgattccgggaagtgttgaca  
ttggggagttcagcgagagcctgacctattgcatctcccgccgtgcacagggtgtcacgttgcaagacctgcctgaaaccgaactgcccgt  
gttctggagccggtcgggaggccatggatgcgattgtcgtcgccgatcttagccagacgagcgggttcggccattcgaccgcaagga  
atcggtcaatacactacatggcgtgattcatatgcgcgattgtgatccccatgtgtatcactggcaactgtgatggacgacaccgtcagtcg  
gtcctgcgcgaggctctcgatgagctgatcgtttggccgaggactccccgaagtccggcacctcgtgcacgaggatttcggctccaaca  
atgtcctgacggacaatggccgcataacagcggtcattgactggagcgaggcgtatgtcggggattccaatacagaggtcgccaacatctct  
tctggaggccgtggttgctgtatggagcagcagcgcgtacttcgagcggagcatccggagcttcagagatcccgcgctccggggc  
gtatatgtcccgattggtcttgaccaactctatcagagcttggtgacggcaatttcgatgatgcagcttgggcgagggtcgatgcgacgca  
atcgtccgatccggagccgggactgtcggggtacacaaatcgccgcagaagcgcgccgtctggaccgatggctgtgtagaagtactc  
gccgatagtgaaccgacgccccagcactcgtccgagggcaaaggaatagatagatgccgaccgCCAGACTTCTTCCCG  
GGCTACCAGGAAGCAGCAGGTGTCTACTGCGTCGGCGAAGTCGACAACGGCAACCCT  
GCCCTCGACTGCCCATACCAGAAGGTCTTGGACGGCGTCCTCAACTATCCGATGTACAT  
CCCCCTATACATTGTTTCATTAGATCTTCGCTAACTCCAACCAGCTACTGGCAACTCCTCT  
ACGCCTTCGAATCCTCCAGCGGCAGCATCAGCAACCTCTACAACATGATCAAATCCGTC  
GCAAGCGACTGCTCCGATCCGACACTACTCGGCAACTTCATCGAAAACCACGACAATC  
CCCGTTTCGCCTCGTATGTCCCACCCCCCTCCCCTCCCTACAATCACACTCACTAATACAT  
CTAACAGCTACACCTCCGACTACTCGCAAGCCAAAAACGTCTCAGCTACATCTTCCTC  
TCCGACGGCATCCCCATCGTCTACGCCGGCGAAGAACAGCACTACTCCGGCGGCAAGG  
TGCCCTACAACCGCGAAGCGACCTGGCTTTTACGGCTACGACACCTCCGCAGAGCTGTA  
CACCTGGATAGCCACCACGAACGCGATCCGCAAACTAGCCATCTCAGCTGACTCGGCC  
TACATTACCTACGCGGTTTCGTCTTCCCTCCCACCCCTTTACCCCCCACCCTACAAACATC  
CCACATACTAACAACATTTCAATAATGAAATAGAATGATGCATTCTACACTGACAGCAA

---

---

CACCATCGCAATGCGCAAAGGCACCTCAGGGAGCCAAGTCATCACCGTCCTCTCCAAC  
AAAGGCTCCTCAGGAAGCAGCTACACCCTGACCCTCAGCGGAAGCGGCTACACATCC  
GGCACGAAGCTGATCGAAGCGTACACATGCACATCCGTGACCGTGGACTCGAGCGGC  
GATATCCCCGTGCCGATGGCGTCGGGATTACCGAGAGTTCTTCTGCCCCGCGTCCGTCGT  
CGATAGCTCTTCGCTCTGTGGCGGGAGCGGAAGATTATACGTCGAGTAA

---

### 3. The sequences of *pyrG* sgRNA expression cassette

---

Green: *A. fumigatus* U6 promoter

Black: linker

Orange: *pyrG* protospacer

Blue: sgRNA scaffold

Red: *A. oryzae* U6 terminator

gcaggcggttgcaagcgatctatcgtgaatttgtggaggacgtaatggtgaaatgccgaatggcgaagcaggctgggagatcggtggtcg  
gacgagcctgatgtagatgggtgcatactttctttctttcacaattcaagatcatgtattagaactacattgctatgttcagcaatatatatgca  
tagctagagagcgtggttacgatgagacatgtaatttgaacatttctgtacagctgtcagagttcgaaggtaagctcgagagcaagga  
ggggaaaagaagacaaaaagacactcgggtccgtctcgaaccgacgaccttgcacacacgtagaaggtagaaaactcaacacctcc  
aaaagaggtctgtaagaatgaaagTAAACTCTTCTCCATCGCCGGTTTTAGAGCTAGAAATAGCAAG  
TTAAAATAAGGCTAGTCCGTTATCAACTTGAAAAAGTGGCACCGAGTCGGTGCTTTTTT  
TTTGAGCATTATCAGCTTGATATAGAGGTAGGAATGTATGGAGGTGCAGAATGGCTATT  
TTGTTATTGGAGCGGGTTCGAAACGGAGGGCAGGAGACTTTTTCTAAATACGTCACGT  
GATATAGAGCTGCT

---

**Table S5** The T7 transcription system of the protospacer RNA.

|                                          |            |
|------------------------------------------|------------|
| T7- protospacer- sgRNA scaffold fragment | 10 $\mu$ L |
| T7 transcriptase                         | 2 $\mu$ L  |
| Buffer                                   | 10 $\mu$ L |
| RNase free water                         | 8 $\mu$ L  |
| Total                                    | 30 $\mu$ L |

37°C , 16 h.

**Table S6** The ethanol precipitation system of the RNA.

|                   |             |
|-------------------|-------------|
| sgRNA product     | 30 $\mu$ L  |
| Isopropyl alcohol | 300 $\mu$ L |
| RNase free water  | 120 $\mu$ L |
| Total             | 450 $\mu$ L |

-20°C, 2 h

**Table S7** The NLS-Cas9 Nuclease cleavage of the target gene system in vitro.

|                          |            |
|--------------------------|------------|
| NLS-Cas9 Nuclease        | 1 $\mu$ L  |
| Buffer                   | 2 $\mu$ L  |
| Target gene DNA fragment | 5 $\mu$ L  |
| sgRNA product            | 2 $\mu$ L  |
| RNase free water         | 10 $\mu$ L |
| Total                    | 20 $\mu$ L |

37°C, 6 h or overnight

**Table S8** The quality control of the RNA samples.

| Name of sample | Concentration | OD260/ | OD260/ | RIN/RQN | 28S/18S | Result    |
|----------------|---------------|--------|--------|---------|---------|-----------|
|                | (ng/ $\mu$ L) | 280    | 230    |         |         |           |
| G1             | 325           | 2.15   | 2.46   | 9.4     | 2.4     | Qualified |
| G2             | 452           | 2.15   | 2.26   | 9.5     | 2.3     | Qualified |
| N1             | 395           | 2.14   | 2.25   | 9.4     | 2.1     | Qualified |
| N2             | 412           | 2.17   | 2.13   | 9.4     | 2.1     | Qualified |

**Table S9** The expression of conidia-associated genes (CAGs) in the spore-like propagule and normal hypha of *Aspergillus niger* SH2.

| Gene ID    | Gene name/PFAMs     | N FPKM   | G FPKM | log <sub>2</sub> (N/G) | P-value |
|------------|---------------------|----------|--------|------------------------|---------|
| An12g10720 | <i>Cat3</i>         | 699.69   | 13.31  | 5.14                   | 0.0000  |
| An12g10710 | Hemerythrin         | 330.76   | 16.47  | 3.75                   | 0.0000  |
| An03g02400 | <i>HfbA</i>         | 17728.19 | 836.07 | 4.41                   | 0.0000  |
| An08g09880 | <i>HfbD</i>         | 22884.13 | 0.00   | 16.66                  | 0.0000  |
| An15g07300 | AAA_22,NB-ARC       | 606.17   | 2.69   | 7.24                   | 0.0000  |
| An17g01885 | CHZ                 | 1962.83  | 31.48  | 5.38                   | 0.0000  |
| An12g10240 | <i>ConJ</i>         | 883.11   | 30.08  | 4.29                   | 0.0000  |
| An15g04670 | DUF1295             | 761.49   | 9.60   | 5.73                   | 0.0000  |
| An14g04530 | NmrA                | 398.41   | 84.82  | 1.65                   | 0.0000  |
| An03g00920 | Epimerase           | 143.36   | 0.41   | 7.79                   | 0.0000  |
| An01g10950 | DJ-1_PfpI,ThiJ_like | 155.42   | 18.93  | 2.46                   | 0.0000  |
| An03g02190 | <i>Hxt5</i>         | 213.22   | 15.65  | 3.19                   | 0.0000  |
| An15g04770 | Pyridoxal_deC       | 117.28   | 10.72  | 2.87                   | 0.0000  |
| An09g03130 | <i>CatA</i>         | 574.11   | 14.38  | 4.74                   | 0.0000  |
| An18g04120 | -                   | 579.79   | 2.91   | 6.99                   | 0.0000  |
| An11g08160 | DUF2235             | 77.44    | 2.41   | 4.41                   | 0.0000  |
| An03g04860 | <i>Nce102</i>       | 349.78   | 74.09  | 1.66                   | 0.0000  |
| An15g05990 | adh_short_C2        | 204.54   | 50.12  | 1.45                   | 0.0000  |
| An09g06270 | -                   | 341.26   | 5.09   | 5.48                   | 0.0000  |
| An08g06600 | -                   | 178.92   | 3.42   | 5.11                   | 0.0000  |
| An01g00280 | HAD                 | 107.11   | 9.28   | 2.95                   | 0.0000  |
| An02g07350 | -                   | 1221.27  | 159.91 | 2.35                   | 0.0000  |
| An09g05520 | -                   | 228.88   | 18.76  | 3.03                   | 0.0000  |
| An11g01750 | <i>PilB</i>         | 101.60   | 9.01   | 2.92                   | 0.0000  |
| An02g08740 | DUF3292             | 122.42   | 5.11   | 4.00                   | 0.0000  |
| An14g06050 | -                   | 683.00   | 135.41 | 1.76                   | 0.0000  |
| An08g03030 | Lactamase_B_2       | 53.92    | 0.75   | 5.54                   | 0.0000  |
| An08g06620 | -                   | 1481.00  | 46.47  | 4.41                   | 0.0000  |
| An09g01150 | adh_short           | 292.26   | 20.23  | 3.28                   | 0.0000  |
| An16g04420 | <i>Ish1</i>         | 436.62   | 146.62 | 1.00                   | 0.0000  |
| An11g06120 | <i>GndB</i>         | 57.25    | 2.22   | 4.10                   | 0.0000  |
| An04g04280 | DUF1772             | 260.04   | 21.23  | 3.03                   | 0.0000  |
| An04g00100 | DUF1761             | 2478.41  | 649.49 | 1.35                   | 0.0000  |
| An18g01860 | <i>Fhk1</i>         | 55.55    | 9.47   | 1.97                   | 0.0000  |
| An08g08500 | DUF3140,Med22       | 80.69    | 2.07   | 4.65                   | 0.0000  |
| An07g03930 | Ferritin_2          | 512.07   | 6.67   | 5.68                   | 0.0000  |
| An04g05790 | <i>VosA</i>         | 79.66    | 5.85   | 3.18                   | 0.0000  |
| An14g07380 | ADH_zinc_N_2        | 14.37    | 0.58   | 3.98                   | 0.0013  |
| An01g05320 | Abhydrolase         | 229.33   | 34.01  | 2.18                   | 0.0000  |

|            |               |         |        |      |        |
|------------|---------------|---------|--------|------|--------|
| An11g02200 | <i>HppD</i>   | 217.06  | 21.50  | 2.76 | 0.0000 |
| An12g01460 | Bac_rhodopsin | 556.33  | 30.36  | 3.61 | 0.0000 |
| An04g09030 | - <i>SfcI</i> | 187.97  | 18.01  | 2.80 | 0.0000 |
| An16g05030 | -             | 1927.62 | 162.99 | 2.99 | 0.0000 |
| An07g06530 | <i>Sur7</i>   | 711.33  | 32.00  | 3.89 | 0.0000 |



**Table S10** The expression of germination-associated genes (GeAGs) in the spore-like propagule and normal hypha.

| Gene ID    | Gene name            | N FPKM   | G FPKM  | log <sub>2</sub> (N/G) | P-value |
|------------|----------------------|----------|---------|------------------------|---------|
| An16g03330 | <i>Bys1</i>          | 2098.74  | 802.17  | 0.81                   | 0.0000  |
| An04g02550 | <i>Mef1</i>          | 70.08    | 34.82   | 0.43                   | 0.1667  |
| An04g02000 | <i>Ytm1</i>          | 39.35    | 15.84   | 0.74                   | 0.1139  |
| An12g08230 | <i>Mrs2</i>          | 20.86    | 32.92   | -0.66                  | 0.0121  |
| An01g10790 | S                    | 15149.26 | 3.60    | 12.04                  | 0.0000  |
| An08g03290 | <i>Nop52</i>         | 28.58    | 12.26   | 0.64                   | 0.2106  |
| An01g03230 | SRP40_C              | 41.69    | 30.96   | 0.43                   | 0.7890  |
| An01g04590 | <i>Nat10</i>         | 30.89    | 15.94   | 0.38                   | 0.4410  |
| An16g04970 | <i>Cpa2</i>          | 127.01   | 94.55   | 0.43                   | 0.6514  |
| An04g01900 | <i>Utp13</i>         | 33.57    | 8.40    | 1.42                   | 0.0118  |
| An15g06390 | <i>Rrp5</i>          | 30.38    | 14.84   | 0.46                   | 0.3512  |
| An16g05290 | <i>Fcy21</i>         | 0.60     | 1.66    | -1.48                  | 0.3644  |
| An13g01230 | zf-LYAR              | 40.33    | 60.69   | -0.59                  | 0.0010  |
| An09g06310 | <i>Rrp15</i>         | 24.56    | 9.38    | 0.81                   | 0.1537  |
| An04g00680 | <i>Nop15</i>         | 89.00    | 43.08   | 0.47                   | 0.1030  |
| An11g10000 | <i>Ipi3</i>          | 16.88    | 5.13    | 1.13                   | 0.1695  |
| An07g06640 | <i>Grc3</i>          | 14.51    | 3.22    | 1.59                   | 0.1027  |
| An11g06110 | <i>Meu1</i>          | 116.12   | 64.49   | 0.27                   | 0.2484  |
| An14g01560 | <i>Zuo1</i>          | 190.47   | 146.52  | 0.38                   | 0.4209  |
| An08g09160 | <i>Utp10</i>         | 38.73    | 17.46   | 0.57                   | 0.1915  |
| An02g14340 | <i>Snu13</i>         | 347.87   | 272.73  | 0.35                   | 0.1931  |
| An02g09200 | <i>Rps0</i>          | 690.43   | 329.60  | 0.49                   | 0.0000  |
| An01g14080 | <i>Rps22</i>         | 891.54   | 686.11  | 0.38                   | 0.0556  |
| An04g09270 | <i>Utp8</i>          | 42.76    | 18.71   | 0.62                   | 0.1706  |
| An02g03860 | <i>Rrp12</i>         | 37.37    | 19.24   | 0.38                   | 0.3411  |
| An18g04470 | <i>Tbfl</i>          | 22.59    | 3.745   | 1.99                   | 0.1027  |
| An17g01270 | <i>Mrpl7</i>         | 100.17   | 54.16   | 0.31                   | 0.2409  |
| An07g06760 | <i>Rps20</i>         | 1230.21  | 797.74  | 0.62                   | 0.2337  |
| An15g01160 | <i>Ecm16</i>         | 13.83    | 4.82    | 0.94                   | 0.2966  |
| An18g04220 | <i>Pet9</i>          | 2450.64  | 2298.74 | 0.09                   | 0.0000  |
| An08g03910 | FMO-like,Pyr_redox_3 | 1434.63  | 1198.21 | 0.26                   | 0.0000  |
| An16g07400 | <i>Mtd1</i>          | 109.15   | 68.72   | 1.59                   | 0.5989  |
| An02g06530 | <i>Chu1</i>          | 79.01    | 72.43   | 0.13                   | 0.1506  |
| An02g07010 | <i>Ubi3</i>          | 1437.33  | 1151.16 | 0.32                   | 0.0014  |
| An02g08080 | <i>Rpl22</i>         | 613.64   | 555.79  | 0.14                   | 0.0000  |
| An14g06860 | <i>Oac1</i>          | 75.65    | 51.19   | 0.56                   | 0.9174  |
| An11g09740 | <i>Ipi3</i>          | 26.22    | 7.24    | 1.28                   | 0.0562  |
| An11g11150 | <i>Utp22</i>         | 22.06    | 6.36    | 1.22                   | 0.0862  |
| An11g00990 | <i>Lag1</i>          | 86.14    | 31.09   | 0.89                   | 0.0076  |

|            |               |         |        |      |        |
|------------|---------------|---------|--------|------|--------|
| An11g05510 | <i>Fpr3</i>   | 167.48  | 115.35 | 0.54 | 0.9981 |
| An02g06320 | <i>Erg13</i>  | 237.14  | 87.53  | 0.86 | 0.0000 |
| An01g08850 | <i>Cpc2</i>   | 1023.66 | 583.26 | 0.23 | 0.0009 |
| An09g03120 | GPI-anchored  | 67.62   | 13.47  | 5.02 | 0.0000 |
| An11g06810 | <i>Mrpl6</i>  | 58.94   | 42.11  | 0.49 | 0.9043 |
| An07g07840 | <i>Rpl23A</i> | 659.48  | 424.41 | 0.64 | 0.3578 |

**Table S11** The expression of genes involved in the production of enzymes involved in cell wall synthesis or processing.

| Gene ID    | Gene name            | N FPKM   | G FPKM  | log <sub>2</sub> (N/G) | P-value |
|------------|----------------------|----------|---------|------------------------|---------|
| An14g05350 | <i>AygI</i>          | 501.47   | 0.60    | 9.71                   | 0.0000  |
| An09g05730 | <i>FwnA</i>          | 386.86   | 6.00    | 6.01                   | 0.0000  |
| An03g03750 | <i>McoC</i>          | 55.32    | 36.32   | 0.61                   | 0.8422  |
| An03g02360 | <i>HfbB</i>          | 16927.17 | 451.67  | 5.23                   | 0.0000  |
| An04g08500 | Hydrophobin          | 208.53   | 11.41   | 4.19                   | 0.0000  |
| An12g05020 | <i>HfbE</i>          | 63.72    | 207.81  | -1.71                  | 0.0000  |
| An07g03340 | <i>HypI</i>          | 150.61   | 22.83   | 2.72                   | 0.0000  |
| An09g06400 | <i>CtcA</i>          | 14.82    | 13.11   | 0.18                   | 0.6398  |
| An04g01430 | SAP                  | 786.88   | 1024.45 | -0.38                  | 0.0000  |
| An06g01000 | CFEM                 | 221.77   | 937.58  | -2.08                  | 0.0000  |
| An07g05570 | <i>ChsA</i>          | 53.69    | 55.22   | -0.04                  | 0.0849  |
| An09g04010 | <i>ChsB</i>          | 158.37   | 107.73  | 0.56                   | 0.9117  |
| An12g10380 | <i>ChsF</i>          | 28.14    | 8.41    | 1.74                   | 0.0065  |
| An02g02340 | <i>ChsL</i>          | 42.62    | 140.55  | -1.72                  | 0.0000  |
| An02g02360 | <i>ChsM</i>          | 24.41    | 89.49   | -1.87                  | 0.0000  |
| An09g02290 | <i>ChsD</i>          | 25.94    | 27.15   | -0.06                  | 0.2171  |
| An08g10740 | DLH                  | 109.61   | 140.01  | -0.35                  | 0.0170  |
| An12g09130 | DLH                  | 171.55   | 86.32   | 0.99                   | 0.0000  |
| An06g01550 | <i>FksA</i>          | 142.07   | 106.305 | 0.42                   | 0.0491  |
| An17g02120 | <i>SmiI</i>          | 84.49    | 104.34  | -0.30                  | 0.5972  |
| An09g03070 | <i>AgsE</i>          | 90.61    | 39.04   | 1.21                   | 0.0011  |
| An04g09890 | <i>AgsA</i>          | 7.37     | 6.34    | 0.22                   | 0.0001  |
| An11g07660 | <i>ExgD</i>          | 21.16    | 10.04   | 1.07                   | 0.6912  |
| An03g05290 | <i>BgtB</i>          | 1027.95  | 549.34  | 0.90                   | 0.4602  |
| An07g04650 | <i>BgtC</i>          | 151.93   | 54.40   | 1.48                   | 0.0000  |
| An19g00090 | LysM,Pectate_lyase_3 | 1.52     | 1.39    | 0.13                   | 0.0003  |
| An16g06800 | <i>EglB</i>          | 74.52    | 45.39   | 0.72                   | 0.8607  |
| An03g06220 | Glyco_hydro_72,X8    | 55.86    | 6.01    | 3.22                   | 0.5830  |
| An16g02850 | Glyco_hydro_16       | 27.78    | 13.53   | 1.04                   | 0.0000  |
| An01g11010 | <i>CrhD</i>          | 120.85   | 43.99   | 1.46                   | 0.3482  |
| An07g01160 | <i>CrhC</i>          | 4.14     | 29.43   | -2.83                  | 0.0017  |
| An07g07530 | <i>CrhB</i>          | 38.38    | 43.09   | -0.17                  | 0.0690  |
| An08g03580 | <i>BgtI</i>          | 2301.31  | 7.81    | 8.20                   | 0.0000  |
| An10g00400 | <i>GelA</i>          | 532.66   | 403.66  | 0.40                   | 0.2242  |
| An16g07040 | <i>BtgE</i>          | 26.48    | 67.87   | -1.36                  | 0.0002  |

**Table S12** The expression and spacer RNA sites of genes involved in the N-acetyl-D-glucosamine metabolic pathway and conidia.

| Gene ID    | Name        | Log <sub>2</sub> (N/G) | Spacer RNA sequence (5'-3')   | Description                                            |
|------------|-------------|------------------------|-------------------------------|--------------------------------------------------------|
| An16g09020 | <i>Ngf1</i> | 2.22                   | GTATGTGC<br>AGGTGTAA<br>ACAG  | N-acetylglucosamine transmembrane transporter activity |
| An13g00510 | <i>Hxk1</i> | 3.23                   | GTGCAAG<br>ACCTTGAC<br>CAATG  | Hexokinase                                             |
| An16g09040 | <i>Dac1</i> | 1.96                   | GAAGTGTC<br>TGAACCTAC<br>TAAG | N-acetylglucosamine-6-phosphate deacetylase activity   |
| An12g00480 | <i>Uap1</i> | 0.12                   | ACAAGGG<br>TGTGAAAG<br>CGCGG  | UDP-N-acetylglucosamine pyrophosphorylase              |
| An08g09880 | <i>HfbD</i> | 16.66                  | GGATGATA<br>GAAAACTT<br>CAGG  | expressed in dormant conidia                           |
| An01g10790 | GC          | 12.03                  | GGTGACAT<br>TATGACTT<br>CATG  | expressed in germinating conidia                       |
| An06g02240 | H-MAPK      | 14.58                  | CCCTGTTC<br>ATTGCTCC<br>AAAA  | MAPK signaling pathway                                 |

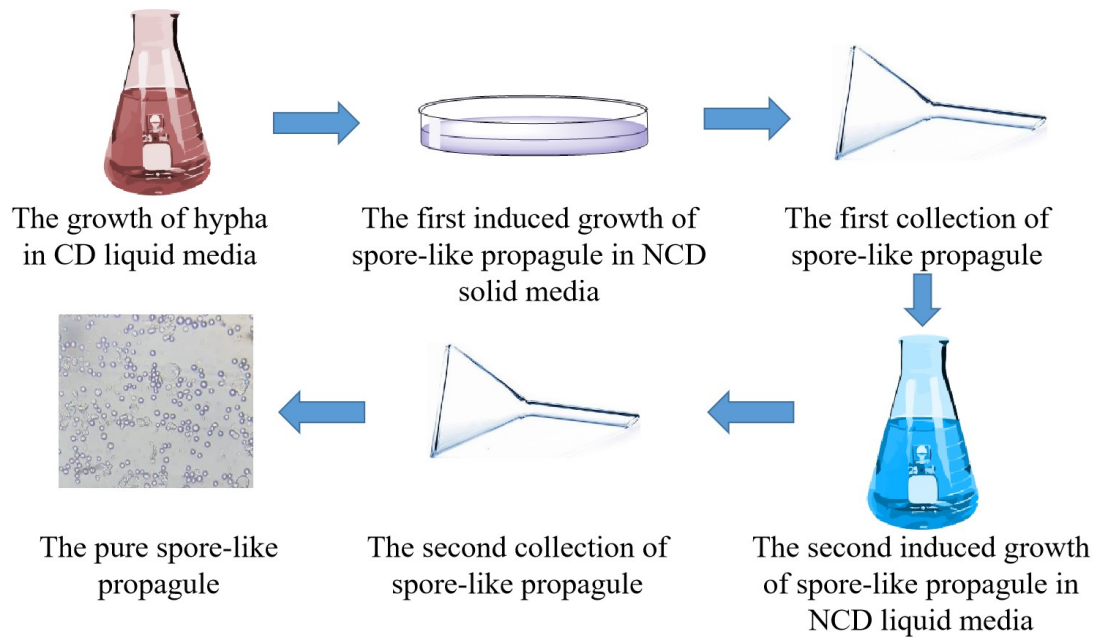

**Figure S1** The flowchart of spore-like propagule purification.

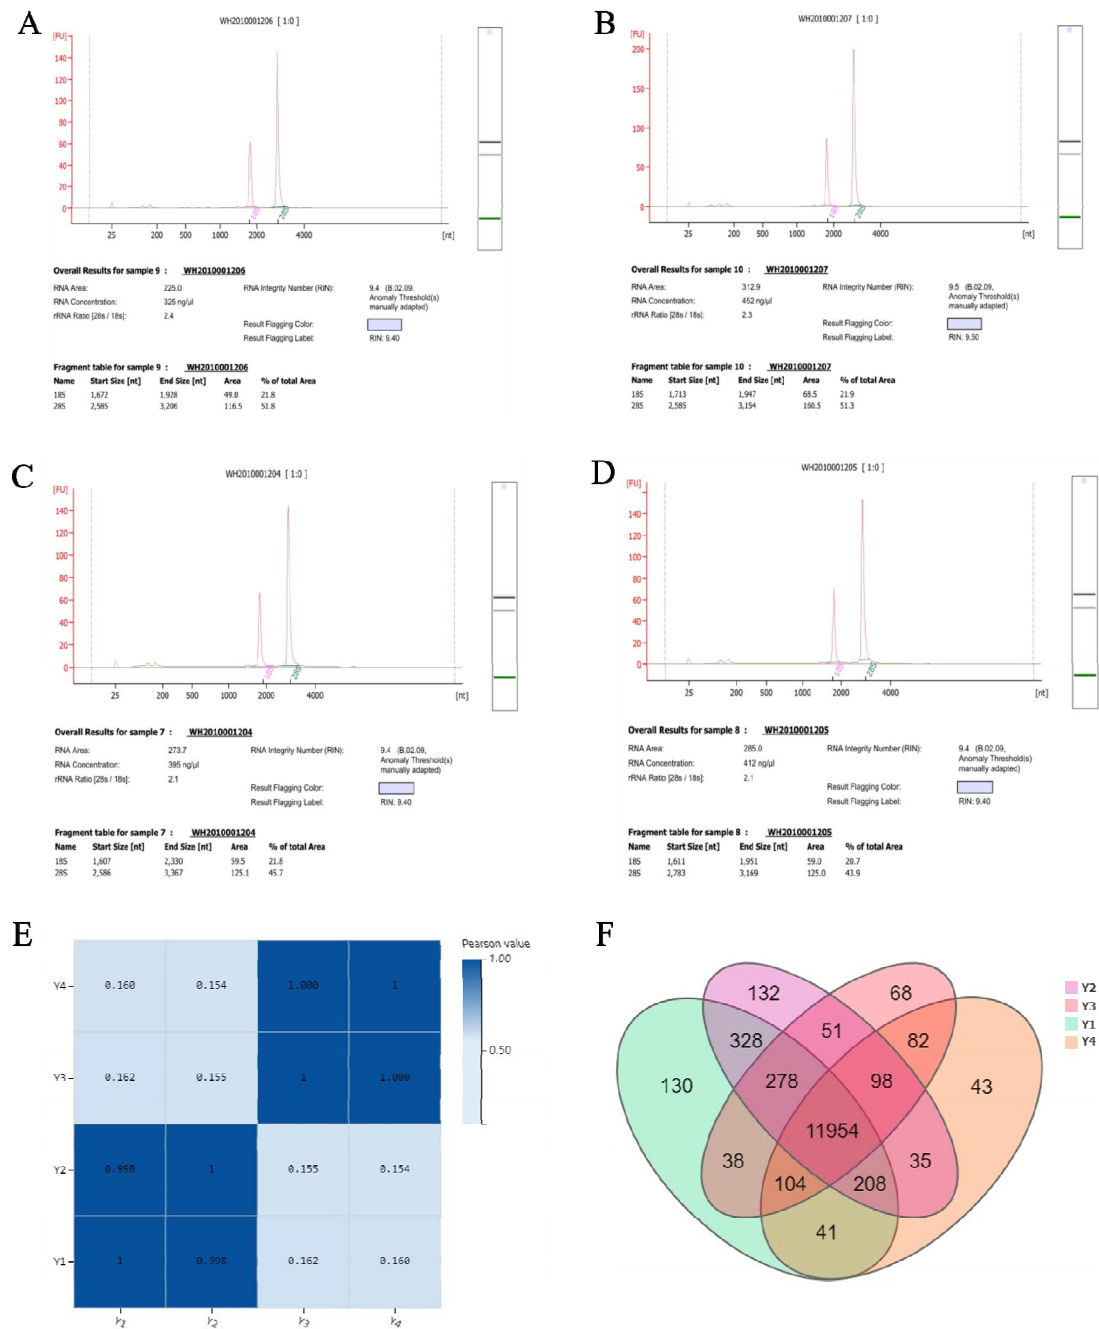

**Figure S2** The RNA sequence of spore-like propagule. (A) The result of sample Y-1 (N1) RNA quality was assessed with Agilent 2100. (B) The result of sample Y-2 (N2) RNA quality was assessed with Agilent 2100. (C) The result of sample Y-3 (G1) RNA quality was assessed with Agilent 2100. (D) The result of sample Y-4 (G2) RNA quality was assessed with Agilent 2100. (E) The heat map of correlation between the samples. (F) The venn diagram of expression level between the samples.

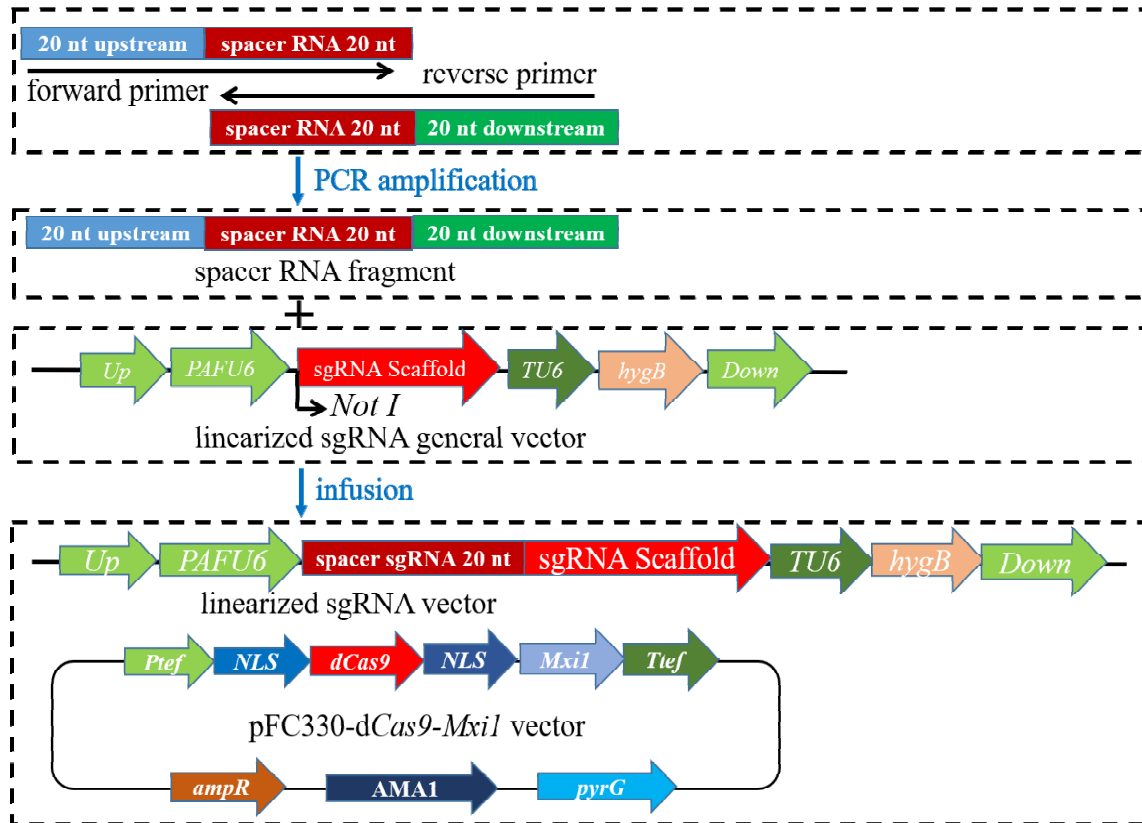

**Figure S3** The flow chart of CRISPRi construction on conidia and GlcNAc metabolic pathway genes. The short spacer RNA fragment (total 60 bp) with 20 bp upstream homologous arm, 20 bp spacer and 20 bp upstream homologous arm was obtained by PCR amplification without template DNA. And the short spacer RNA fragment was connected to linearized sgRNA general vector using infusion method. The sgRNA general vector was linearized by *NotI* enzyme.

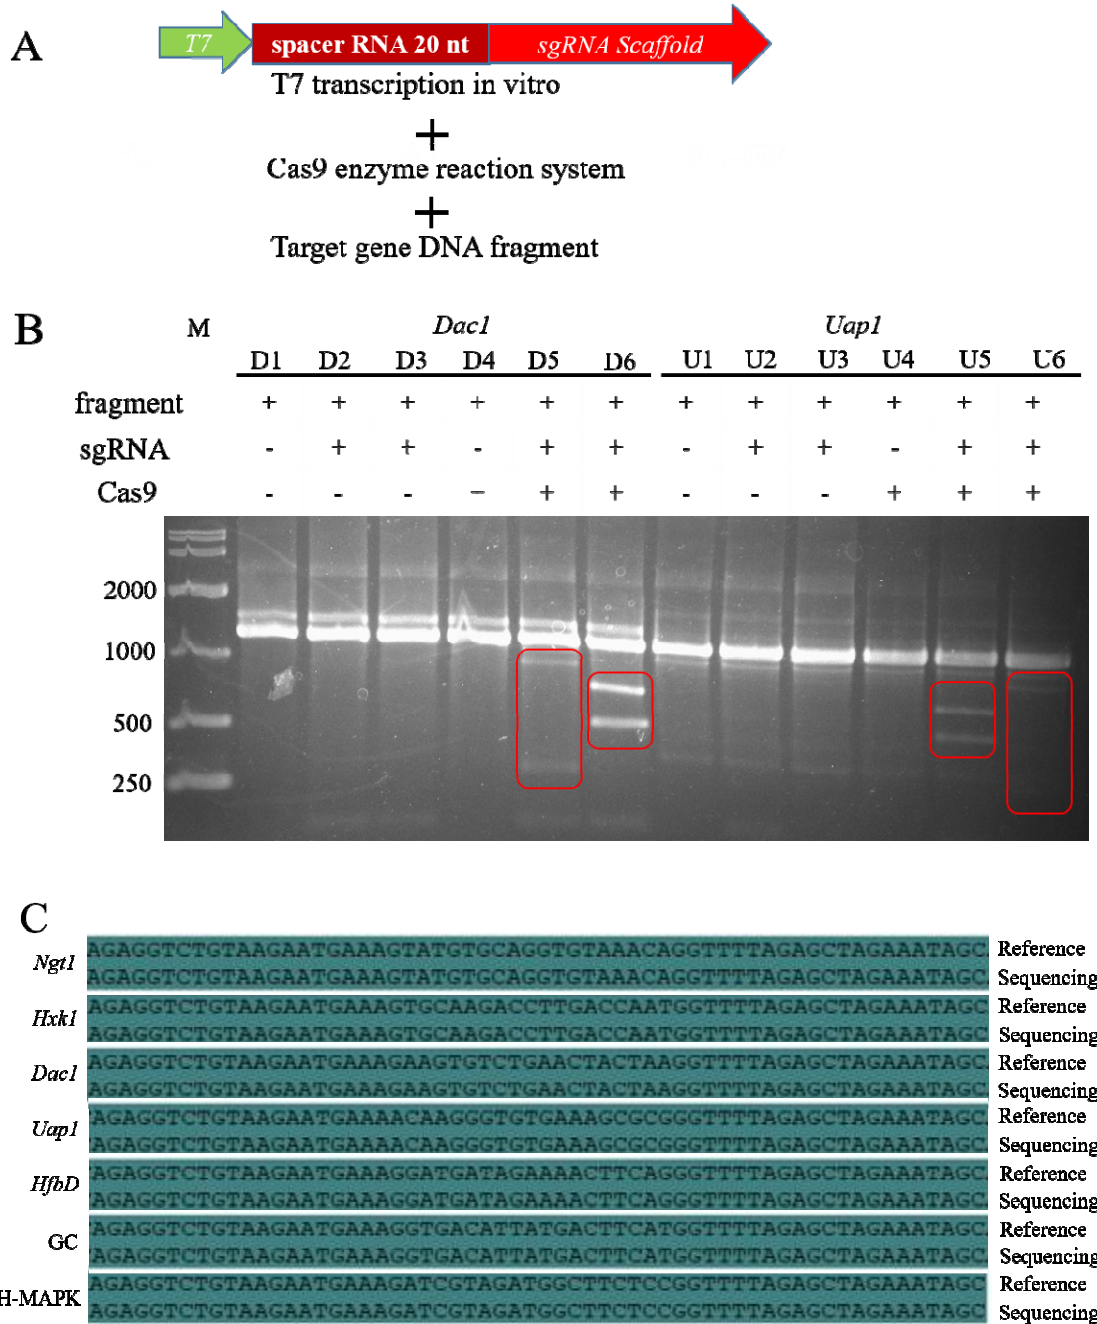

**Figure S4** The construction of CRISPRi on conidia and GlcNAc metabolic pathway genes in the *Aspergillus niger* SH2. (A) The T7 transcription of sgRNA in vitro. (B) The Cas9 digestion of a 1200 bp DNA fragment with each sgRNA variant in vitro. (C) The sequencing and alignment of spacer RNA sequence that was connected into linearized sgRNA general vector using infusion method.
